# Supplementary material for: Erythroid Differentiation Regulator 1 Ameliorates Collagen-Induced Arthritis via Activation of Regulatory T Cells
Source: MDPI journal article supplement (doi:10.3390/ijms21249555), 2020-12-15
Supplement: s1 [file s1]

# Supplementary Figures

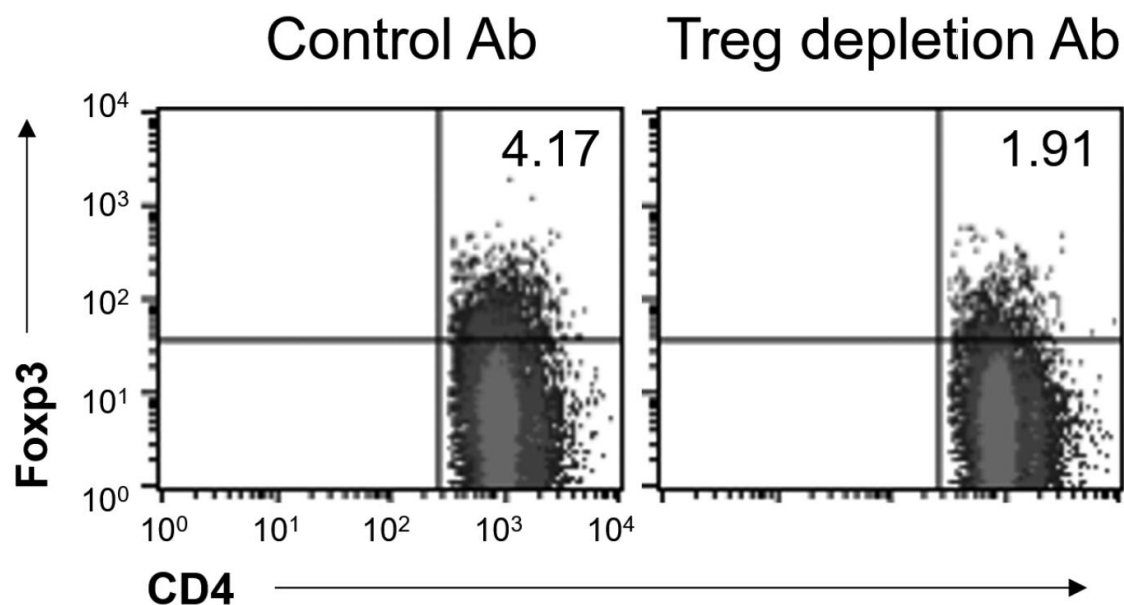

**Figure S1.** Confirmation of regulatory T (Treg) cell depletion. Treg depletion antibody or isotype control antibody was administrated to collagen-induced arthritis (CIA) mice, and 48h later draining lymph nodes were collected. Treg populations were compared using flow cytometry.

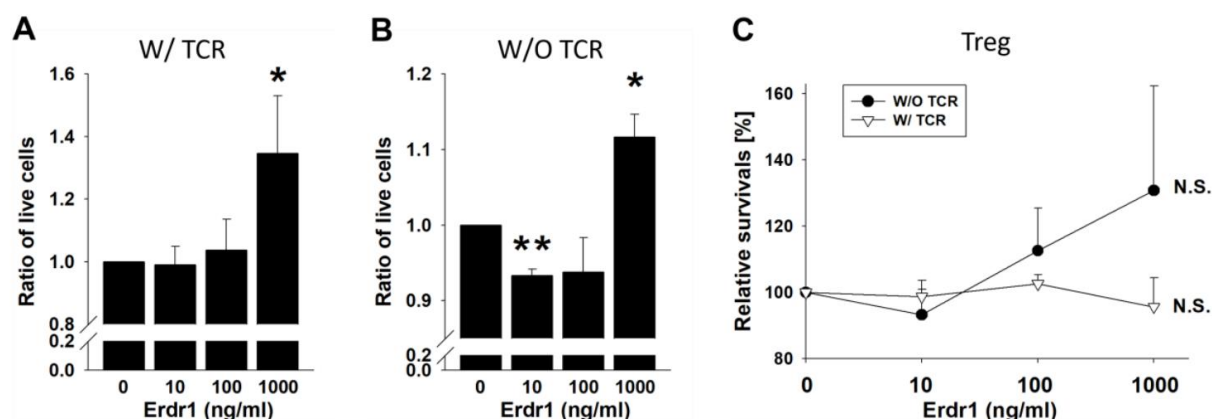

**Figure S2.** T cell viability. CD4 T cells were treated with various doses of Erythroid differentiation regulator 1 (Erdri) in the presence (A) or absence (B) of T cell receptor (TCR) stimulation for 48 h, and cell viabilities were presented as mean  $\pm$  SD from three independent experiments in triplicate ( $n = 3$ ). (C) Relative survivals of Treg cells (gated on CD4<sup>+</sup> +Foxp3<sup>+</sup>) in the absence or presence of TCR stimulation were expressed as mean  $\pm$  SD from three independent experiments in triplicate ( $n = 3$ ). Relative cell viability and survival were evaluated based on the percentages of flow cytometric gate for live lymphocytes. \*  $p < 0.05$ .
